# Supplementary material for: Disparities in Wait Times for Care Among US Veterans by Race and Ethnicity
Source: PubMed Central journal article supplement (PMC9871804; doi:10.1001/jamanetworkopen.2022.52061), 2023-01-23
Supplement: jamanetwopen-e2252061-s001.pdf [file jamanetwopen-e2252061-s001.pdf]

## Supplementary Online Content

Gurewich D, Beilstein-Wedel E, Shwartz M, Davila H, Rosen AK. Disparities in wait times for care among US veterans by race and ethnicity. *JAMA Netw Open*. 2023;6(1):e2252061. doi:10.1001/jamanetworkopen.2022.52061

**eTable 1.** Full Regression Results

**eTable 2.** Log Likelihood Ratio Test Results

This supplementary material has been provided by the authors to give readers additional information about their work.

eTable 1. Full Regression Results

|                                            | Cardiology  |                |         |             |                |         | Orthopedics |                |         |             |                |         |
|--------------------------------------------|-------------|----------------|---------|-------------|----------------|---------|-------------|----------------|---------|-------------|----------------|---------|
|                                            | Blacks      |                |         | Hispanics   |                |         | Blacks      |                |         | Hispanics   |                |         |
|                                            | Coefficient | 95% Conf. Int. | p-value | Coefficient | 95% Conf. Int. | p-value | Coefficient | 95% Conf. Int. | p-value | Coefficient | 95% Conf. Int. | p-value |
| <b>Race * COVID (ref=White, pre-COVID)</b> |             |                |         |             |                |         |             |                |         |             |                |         |
| Minority, COVID                            | 5.003       | (3.70, 6.31)   | < 0.001 | 5.165       | (3.83, 6.51)   | < 0.001 | 6.19        | (4.62, 7.76)   | < 0.001 | 5.696       | (4.10, 7.29)   | < 0.001 |
| White, COVID                               | 4.475       | (3.40, 5.56)   | < 0.001 | 4.485       | (3.40, 5.57)   | < 0.001 | 3.746       | (2.30, 5.19)   | < 0.001 | 3.714       | (2.28, 5.15)   | < 0.001 |
| Minority, pre-COVID                        | 0.261       | (-0.23, 0.75)  | 0.30    | 0.079       | (-0.47, 0.63)  | 0.78    | 2.093       | (1.57, 2.61)   | < 0.001 | 1.295       | (0.78, 1.81)   | < 0.001 |
| <b>Age</b>                                 | 0.127       | (0.12, 0.14)   | < 0.001 | 0.132       | (0.12, 0.14)   | < 0.001 | 0.03        | (0.02, 0.04)   | < 0.001 | 0.023       | (0.02, 0.03)   | < 0.001 |
| <b>Female (ref=Male)</b>                   | -1.004      | (-1.33, -0.68) | < 0.001 | -0.916      | (-1.30, -0.54) | < 0.001 | -0.061      | (-0.30, 0.18)  | 0.62    | -0.037      | (-0.31, 0.23)  | 0.79    |
| <b>Marital Status (ref=Married)</b>        |             |                |         |             |                |         |             |                |         |             |                |         |
| Divorced                                   | 0.256       | (0.05, 0.46)   | 0.01    | 0.313       | (0.10, 0.53)   | 0.005   | -0.182      | (-0.37, 0.00)  | 0.05    | -0.274      | (-0.47, -0.08) | 0.006   |
| Widowed                                    | -0.022      | (-0.40, 0.345) | 0.91    | 0.21        | (-0.18, 0.60)  | 0.30    | -0.483      | (-0.89, -0.07) | 0.02    | -0.361      | (-0.79, 0.07)  | 0.10    |
| Single                                     | 0.606       | (0.34, 0.87)   | < 0.001 | 0.718       | (0.42, 1.02)   | < 0.001 | -0.7        | (-0.92, -0.48) | < 0.001 | -0.829      | (-1.07, -0.59) | < 0.001 |
| Unknown                                    | -0.448      | (-1.07, 0.17)  | 0.16    | -0.285      | (-0.95, 0.38)  | 0.40    | 0.042       | (-0.47, 0.56)  | 0.87    | 0.073       | (-0.47, 0.61)  | 0.79    |
| <b>Rurality (ref=Urban)</b>                |             |                |         |             |                |         |             |                |         |             |                |         |

|                                                |        |                |         |        |                  |         |        |                |         |        |                |         |
|------------------------------------------------|--------|----------------|---------|--------|------------------|---------|--------|----------------|---------|--------|----------------|---------|
| Rural                                          | 1.417  | (1.22, 1.61)   | < 0.001 | 1.399  | (1.19, 1.61)     | < 0.001 | 1.125  | (0.95, 1.30)   | < 0.001 | 1.097  | (0.91, 1.28)   | < 0.001 |
| Unknown                                        | 8.461  | (3.39, 13.53)  | 0.002   | 8.555  | (2.65, 14.46)    | 0.005   | 4.093  | (-1.28, 9.47)  | 0.14    | 7.036  | (0.85, 13.22)  | 0.03    |
| <b>Nosos Concurrent</b>                        | -0.419 | (-0.45, -0.38) | < 0.001 | -0.443 | (-0.48, -0.40)   | < 0.001 | -0.493 | (-0.53, -0.45) | < 0.001 | -0.486 | (-0.53, -0.44) | < 0.001 |
| <b>Priority Group (ref=1-4)</b>                |        |                |         |        |                  |         |        |                |         |        |                |         |
| 5-6                                            | 0.096  | (-0.11, 0.30)  | 0.35    | 0.043  | (-0.17, 0.26)    | 0.70    | -0.765 | (-0.96, -0.57) | < 0.001 | -0.8   | (-1.01, -0.59) | < 0.001 |
| 7-8                                            | -0.872 | (-1.12, -0.62) | < 0.001 | -0.92  | 0 (-1.19, -0.66) | < 0.001 | -1.984 | (-2.23, -1.74) | < 0.001 | -2.035 | (-2.29, -1.78) | < 0.001 |
| <b>Specialty Patient Care, 2018</b>            | -0.01  | (-0.01, -0.01) | < 0.001 | -0.011 | (-0.01, -0.01)   | < 0.001 | -0.007 | (-0.01, -0.01) | < 0.001 | -0.008 | (-0.01, -0.01) | < 0.001 |
| <b>Food Insecurity (ref=Not food insecure)</b> |        |                |         |        |                  |         |        |                |         |        |                |         |
| Yes, Food insecurity                           | 0.207  | (-0.84, 1.25)  | 0.70    | 0.743  | (-0.48, 1.97)    | 0.24    | 0.475  | (-0.42, 1.37)  | 0.30    | 0.057  | (-0.99, 1.10)  | 0.92    |
| Unknown, Food insecurity                       | -1.461 | (-1.89, -1.03) | < 0.001 | -1.257 | (-1.73, -0.79)   | < 0.001 | -1.998 | (-2.38, -1.61) | < 0.001 | -2.035 | (-2.45, -1.62) | < 0.001 |
| <b>Homeless (ref=Not homeless)</b>             |        |                |         |        |                  |         |        |                |         |        |                |         |
| Homeless or at risk of homelessness            | 0.292  | (-0.14, 0.73)  | 0.19    | 0.314  | (-0.21, 0.84)    | 0.25    | -0.289 | (-0.67, 0.09)  | 0.13    | -0.299 | (-0.75, 0.15)  | 0.19    |
| Unknown                                        | 0.685  | (0.21, 1.16)   | 0.005   | 0.58   | (0.06, 1.10)     | 0.03    | 0.343  | (-0.08, 0.77)  | 0.12    | 0.268  | (-0.19, 0.72)  | 0.25    |
| <b>Constant</b>                                | 24.118 | (22.53, 25.71) | < 0.001 | 23.811 | (22.25, 25.37)   | < 0.001 | 31.218 | (29.54, 32.90) | < 0.001 | 31.724 | (30.07, 33.38) | < 0.001 |

**eTable 2.** Log Likelihood Ratio Test Results

|                                 | Cardiology |           | Orthopedics |           |
|---------------------------------|------------|-----------|-------------|-----------|
|                                 | Blacks     | Hispanics | Blacks      | Hispanics |
| Full Model Log Likelihood       | -2917610   | -2578294  | -2912414    | -2536090  |
| Simplified Model Log Likelihood | -2918700   | -2578674  | -2914339    | -2536748  |
| Likelihood Ratio Test p-value   | <0.001     | <0.001    | <0.001      | <0.001    |
